# Supplementary material for: Comparative study on synchronous adsorption of arsenate and fluoride in aqueous solution onto MgAlFe-LDHs with different intercalating anions
Source: Royal Society of Chemistry journal article supplement (doi:10.1039/c8ra05968c), 2018-01-01
Supplement: c8ra05968c1.pdf [file c8ra05968c1.pdf]

1  
2  
3  
4  
5  
6  
7  
8  
9  
10  
11  
12  
13  
14  
15  
16  
17  
18

**Supporting information**

**Comparative study on synchronous adsorption of arsenate and fluoride in aqueous solution onto MgAlFe-LDHs  
with different intercalation anions**

Lu Hongtao<sup>a,b</sup>, Liu Shuxia<sup>a</sup>, Zhang Hua<sup>a</sup>, Qiu Yanling<sup>c</sup>, Yin Daqiang<sup>c</sup>, Jianfu Zhao<sup>a</sup>, Zhu Zhiliang<sup>a,c\*</sup>

<sup>a</sup>State Key Laboratory of Pollution Control and Resource Reuse, Tongji University, Shanghai 200092, China;

<sup>b</sup>Post doctoral Research Station, College of Civil Engineering, Tongji University, Shanghai 200092, China

<sup>c</sup>Key Laboratory of Yangtze River Water Environment, Ministry of Education, Tongji University, Shanghai 200092,  
China;

**Correspondence information:**

Zhiliang Zhu, Professor

State Key Laboratory of Pollution Control and Resource Reuse, Tongji University, 1239 Siping Road, Shanghai, 200092,  
China.

E-mail: [zzl@tongji.edu.cn](mailto:zzl@tongji.edu.cn)

Phone: +86-21-6598 2426, Fax: +86-21-6598 4626

## Supporting information

**Table S1** Fitting curve parameters of arsenic adsorption isothermal equation

| Isotherm   | Constants                                                        | MgAlFe-CLDH | MgAlFe-Cl-LDH | MgAlFe-NO <sub>3</sub> -LDH |
|------------|------------------------------------------------------------------|-------------|---------------|-----------------------------|
| Langmuir   | $Q_m$ (mg·g <sup>-1</sup> )                                      | 158.2       | 79.69         | 179.9                       |
|            | $K_L$ (L·mg <sup>-1</sup> )                                      | 0.0311      | 2.532         | 0.1819                      |
|            | $R^2$                                                            | 0.9420      | 0.9797        | 0.9579                      |
| Freundlich | $K_f$ (mg·g <sup>-1</sup> )(L·mg <sup>-1</sup> ) <sup>-1/n</sup> | 9.016       | 40.11         | 60.10                       |
|            | n                                                                | 1.622       | 4.039         | 3.896                       |
|            | $R^2$                                                            | 0.9694      | 0.9600        | 0.9932                      |
| Sips       | $Q_m$ (mg·g <sup>-1</sup> )                                      | 200         | 94.30         | 1027                        |
|            | $K_s$ (L·mg <sup>-1</sup> ) <sup>m</sup>                         | 0.0379      | 1.078         | 0.0623                      |
|            | m                                                                | 0.8124      | 0.6258        | 0.2842                      |
|            | $R^2$                                                            | 0.9554      | 0.9968        | 0.9936                      |

**Table S2** Fitting curve parameters of arsenic adsorption kinetic equation

| Materials                   | Pseudo first-order kinetic model |                               |        | Pseudo second-order kinetic model |                                   |        |
|-----------------------------|----------------------------------|-------------------------------|--------|-----------------------------------|-----------------------------------|--------|
|                             | $Q_e$<br>(mg·g <sup>-1</sup> )   | $K_1$<br>(min <sup>-1</sup> ) | $R^2$  | $Q_e$<br>(mg·g <sup>-1</sup> )    | $K_2$<br>g·(mg·min) <sup>-1</sup> | $R^2$  |
| MgAlFe-CLDH                 | 48.22                            | 0.0257                        | 0.8752 | 50.76                             | 0.0008827                         | 0.9954 |
| MgAlFe-Cl-LDH               | 39.74                            | 0.0153                        | 0.7647 | 43.29                             | 0.0005218                         | 0.9839 |
| MgAlFe-NO <sub>3</sub> -LDH | 40.45                            | 0.0149                        | 0.7730 | 43.93                             | 0.0004858                         | 0.9799 |

**Table S3** Fitting curve parameters of fluoride adsorption isothermal equation

| Isotherm   | Constants                                                        | MgAlFe-CLDH | MgAlFe-Cl-LDH | MgAlFe-NO <sub>3</sub> -LDH |
|------------|------------------------------------------------------------------|-------------|---------------|-----------------------------|
| Langmuir   | $Q_m$ (mg·g <sup>-1</sup> )                                      | 29.78       | 10.27         | 18.62                       |
|            | $K_L$ (L·mg <sup>-1</sup> )                                      | 0.08618     | 0.1229        | 0.1015                      |
|            | $R^2$                                                            | 0.9460      | 0.9586        | 0.9598                      |
| Freundlich | $K_f$ (mg·g <sup>-1</sup> )(L·mg <sup>-1</sup> ) <sup>-1/n</sup> | 3.899       | 1.532         | 2.742                       |
|            | n                                                                | 1.922       | 2.021         | 2.016                       |
|            | $R^2$                                                            | 0.9698      | 0.9049        | 0.9658                      |
| Sips       | $Q_m$ (mg·g <sup>-1</sup> )                                      | -           | 8.384         | 54.83                       |
|            | $K_s$ (L·mg <sup>-1</sup> ) <sup>m</sup>                         | -           | 0.05914       | 0.04937                     |
|            | m                                                                | -           | 1.705         | 0.5856                      |
|            | $R^2$                                                            | -           | 0.9713        | 0.9665                      |

1 **Table S4** Fitting curve parameters of fluoride adsorption kinetic equation

| Materials                   | Pseudo first-order kinetic model           |                                |        | Pseudo second-order kinetic model          |                                                                |        |
|-----------------------------|--------------------------------------------|--------------------------------|--------|--------------------------------------------|----------------------------------------------------------------|--------|
|                             | $Q_e$<br>( $\text{mg}\cdot\text{g}^{-1}$ ) | $K_1$<br>( $\text{min}^{-1}$ ) | $R^2$  | $Q_e$<br>( $\text{mg}\cdot\text{g}^{-1}$ ) | $K_2$<br>( $\text{g}\cdot\text{mg}^{-1}\cdot\text{min}^{-1}$ ) | $R^2$  |
| MgAlFe-CLDH                 | 9.166                                      | 0.0151                         | 0.8488 | 9.922                                      | 0.00235                                                        | 0.9888 |
| MgAlFe-Cl-LDH               | 7.843                                      | 0.0157                         | 0.7964 | 8.469                                      | 0.00286                                                        | 0.9902 |
| MgAlFe-NO <sub>3</sub> -LDH | 8.245                                      | 0.0493                         | 0.9233 | 8.577                                      | 0.00951                                                        | 0.9923 |

2

3 **Table S5** Fitting curve parameters of adsorption isothermal equation of binary system

|                                       |                                                                         | As(V)  | F <sup>-</sup> |
|---------------------------------------|-------------------------------------------------------------------------|--------|----------------|
| MgAlFe-CLDH<br>(Freundlich)           | $K_f (\text{mg}\cdot\text{g}^{-1})(\text{L}\cdot\text{mg}^{-1})^{-1/n}$ | 5.975  | 0.9692         |
|                                       | $n$                                                                     | 2.376  | 1.902          |
|                                       | $R^2$                                                                   | 0.8906 | 0.9437         |
| MgAlFe-Cl-LDH<br>(Sips)               | $Q_m(\text{mg}\cdot\text{g}^{-1})$                                      | 45.51  | 15.71          |
|                                       | $K_s(\text{L}\cdot\text{mg}^{-1})^m$                                    | 0.5986 | 0.0560         |
|                                       | $m$                                                                     | 1.305  | 1.025          |
| MgAlFe-NO <sub>3</sub> -LDH<br>(Sips) | $R^2$                                                                   | 0.9484 | 0.9988         |
|                                       | $Q_m(\text{mg}\cdot\text{g}^{-1})$                                      | 39.43  | 42596          |
|                                       | $K_s(\text{L}\cdot\text{mg}^{-1})^m$                                    | 11.64  | 0.00002769     |
|                                       | $m$                                                                     | 1.557  | 0.64           |
|                                       | $R^2$                                                                   | 0.9790 | 0.9888         |

4

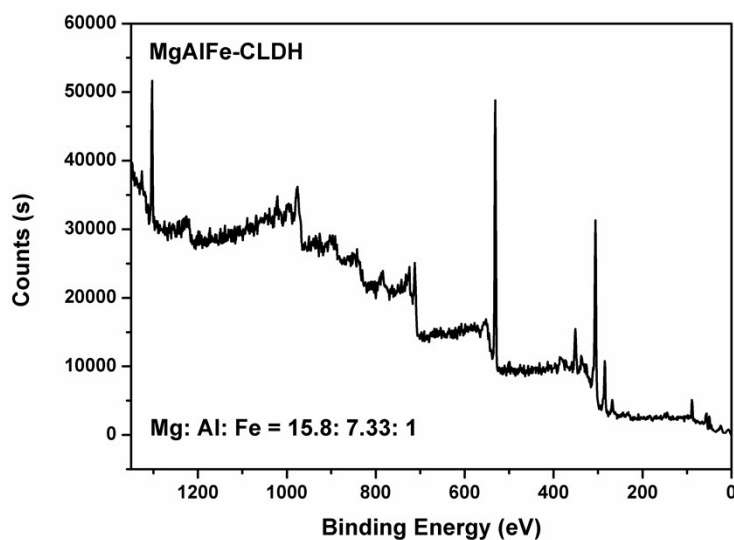

5

6 **Fig. S1** The full-range XPS spectra of MgAlFe-CLDH

7

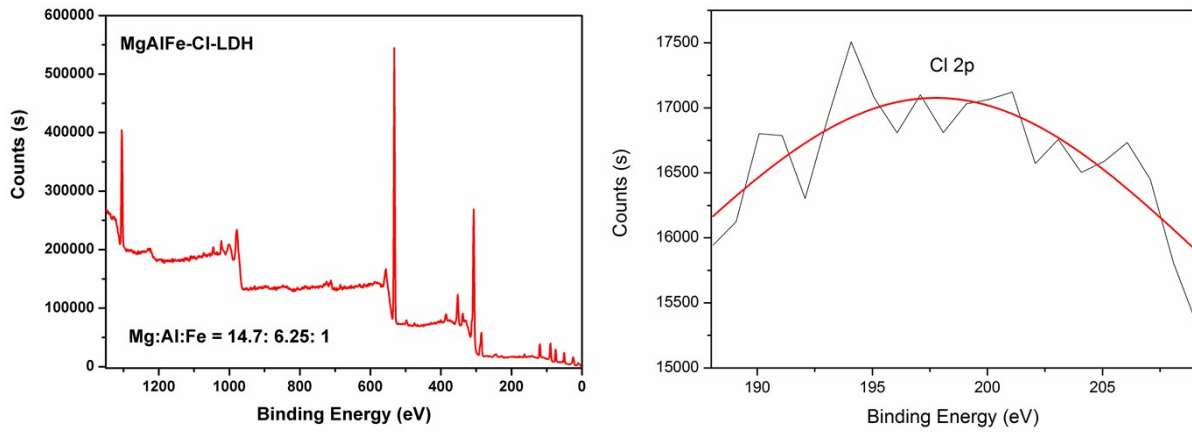

1  
2  
3

**Fig. S2** The full-range XPS spectra of MgAlFe-Cl-LDH and Peak of Cl 2p

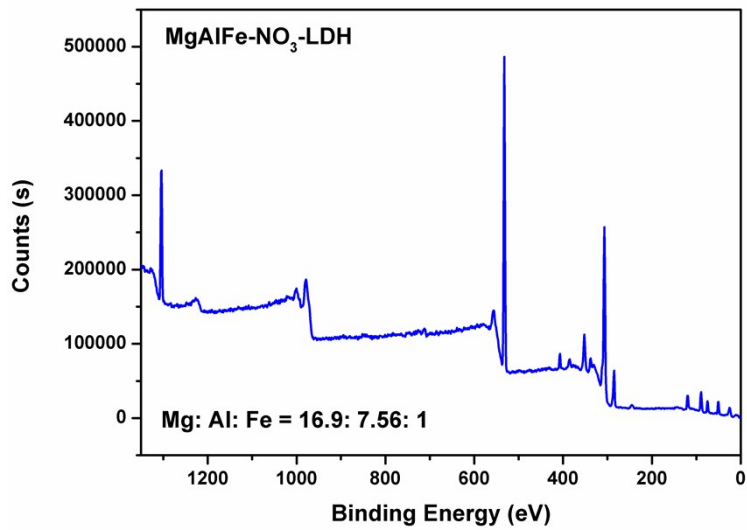

4  
5  
6  
7

**Fig. S3** The full-range XPS spectra of MgAlFe-NO<sub>3</sub>-LDH

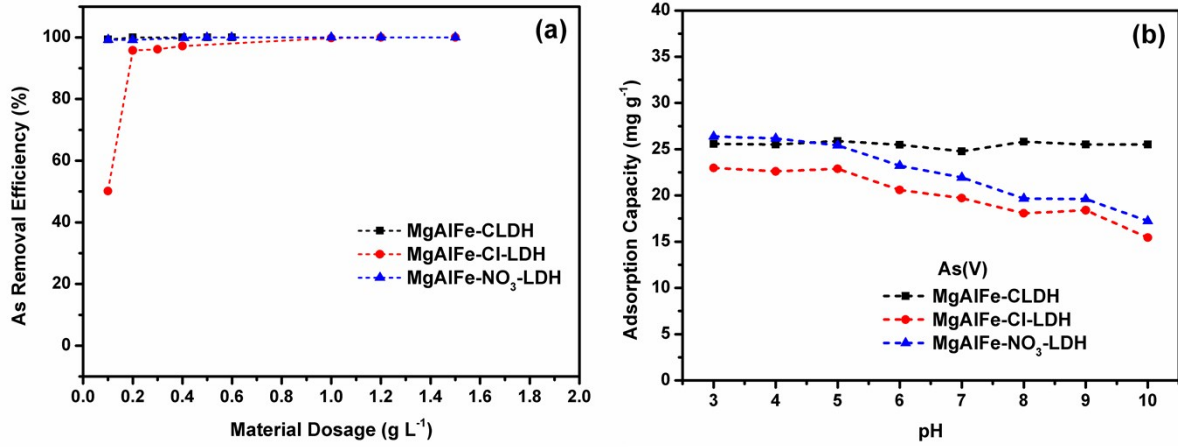

1  
2 **Fig. S4 (a)** Effect of dosage on arsenic adsorption; **(b)** Effect of pH on arsenic adsorption

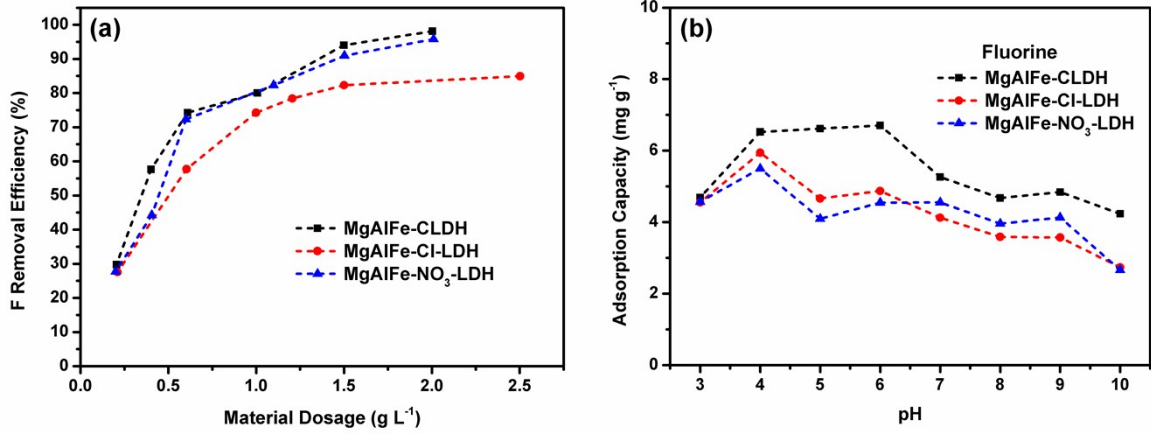

5  
6 **Fig. S5 (a)** Effect of dosage on fluoride adsorption; **(b)** Effect of pH on fluoride adsorption

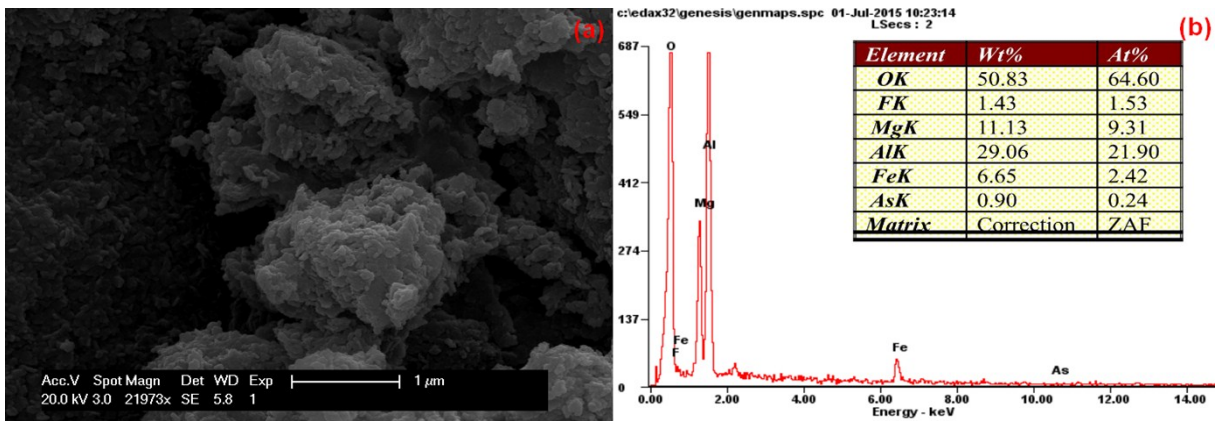

8  
9 **Fig. S6 (a)** SEM image and **(b)** EDS figure of MgAlFe-NO<sub>3</sub>-LDH after adsorption of arsenic and fluoride
